# Supplementary material for: Emulated Clinical Trials from Longitudinal Real-World Data Efficiently Identify Candidates for Neurological Disease Modification: Examples from Parkinson’s Disease
Source: bioRxiv or medRxiv preprint supplement (doi:10.1101/2020.08.11.20171447), 2020-11-20
Supplement: Supplementary file [file 2020.08.11.20171447-1.pdf]

## Supplemental Material for “Emulated Clinical Trials from Longitudinal Real-World Data Efficiently Identify Candidates for Neurological Disease Modification: Examples from Parkinson's Disease”

**Table S1. ICD codes for PD cohort definition**

| Type      | System | Code  | Name                                                                   |
|-----------|--------|-------|------------------------------------------------------------------------|
| Inclusion | icd9   | 3320  | Paralysis agitans                                                      |
|           | icd10  | G20   | Parkinson's disease                                                    |
| Exclusion | icd9   | 3316  | Corticobasal degeneration                                              |
|           | icd9   | 3321  | Secondary parkinsonism                                                 |
|           | icd9   | 3330  | Other degenerative diseases of the basal ganglia                       |
|           | icd10  | G21   | Secondary parkinsonism                                                 |
|           | icd10  | G231  | Progressive supranuclear ophthalmoplegia [Steele-Richardson-Olszewski] |
|           | icd10  | G3185 | Corticobasal degeneration                                              |

**Table S2. PD-indicated drugs and their corresponding ATC class names.** The list below has been compiled by a domain expert based on the following sources: National Drug File – Reference Terminology (NDF-RT), Anatomical Therapeutic Chemical Classification System (ATC), and DrugBank (45).

| Drug          | ATC class code(s) | ATC class name(s)                                       |
|---------------|-------------------|---------------------------------------------------------|
| Amantadine    | N04BB             | Adamantane derivatives                                  |
| Apomorphine   | G04BE; N04BC      | Drugs used in erectile dysfunction; dopamine agonists   |
| Atropine      | A03BA; S01FA      | Belladonna alkaloids, tertiary amines; anticholinergics |
| Benztropine   | N04AC             | Ethers of tropine or tropine derivatives                |
| Biperiden     | N04AA             | Tertiary amines                                         |
| Bornaprine    | N04AA             | Tertiary amines                                         |
| Bromocriptine | G02CB; N04BC      | Prolactine inhibitors; dopamine agonists                |
| Budipine      | N04BX             | Other dopaminergic agents                               |

|                     |              |                                                                                       |
|---------------------|--------------|---------------------------------------------------------------------------------------|
| Cabergoline         | G02CB; N04BC | Prolactine inhibitors; dopamine agonists                                              |
| Carbidopa           | N/A          | N/A                                                                                   |
| Dexetimide          | N04AA        | Tertiary amines                                                                       |
| Dihydroergocryptine | N04BC        | Dopamine agonists                                                                     |
| Entacapone          | N04BX        | Other dopaminergic agents                                                             |
| Hyoscyamine         | A03BA        | Belladonna alkaloids, tertiary amines                                                 |
| Levodopa            | N04BA        | Dopa and dopa derivatives                                                             |
| Methixene           | N04AA        | Tertiary amines                                                                       |
| Orphenadrine        | N04AB; M03BC | Ethers chemically close to antihistamines; ethers, chemically close to antihistamines |
| Pergolide           | N04BC        | Dopamine agonists                                                                     |
| Piribedil           | N04BC        | Dopamine agonists                                                                     |
| Pramipexole         | N04BC        | Dopamine agonists                                                                     |
| Procyclidine        | N04AA        | Tertiary amines                                                                       |
| Profenamine         | N04AA        | Tertiary amines                                                                       |
| Rasagiline          | N04BD        | Monoamine oxidase B inhibitors                                                        |
| Ropinirole          | N04BC        | Dopamine agonists                                                                     |
| Rotigotine          | N04BC        | Dopamine agonists                                                                     |
| Selegiline          | N04BD        | Monoamine oxidase B inhibitors                                                        |
| Tolcapone           | N04BX        | Other dopaminergic agents                                                             |
| Trihexyphenidyl     | N04AA        | Tertiary amines                                                                       |
| Tropatepine         | N04AA        | Tertiary amines                                                                       |

**Table S3. PD outcome definitions.**

| Outcome | System | Code   | Name             |
|---------|--------|--------|------------------|
| Fall    | ICD9   | E88    | Accidental falls |
|         | ICD10  | W0, W1 | Falls            |

| Outcome   | System | Code | Name                                                               |
|-----------|--------|------|--------------------------------------------------------------------|
| Psychosis | ICD9   | 292  | Drug-induced mental disorders                                      |
|           |        | 297  | Delusional disorders                                               |
|           |        | 298  | Other nonorganic psychoses                                         |
|           | ICD10  | F2   | Schizophrenia, schizotypal and delusional disorders                |
| Dementia  | ICD9   | 294  | Persistent mental disorders due to conditions classified elsewhere |
|           |        | 331  | Other cerebral degenerations                                       |
|           | ICD10  | F01  | Vascular dementia                                                  |
|           |        | F02  | Dementia in other diseases classified elsewhere                    |
|           |        | F03  | Unspecified dementia                                               |
|           |        | G30  | Alzheimer disease                                                  |

**Table S4. Rasagiline cohort characteristics.** Shown are the mean, standard deviation (in parentheses), and the first, second (median), and third quartile (in brackets).

|                                                                   | MarketScan                    | Explorys                      |
|-------------------------------------------------------------------|-------------------------------|-------------------------------|
| <b>Patient count</b>                                              | 3,094                         | 1,988                         |
| <b>Patient timeline [years]</b>                                   |                               |                               |
| <b>Total</b>                                                      | 4.1 (1.0) [3.0; 4.6; 5.0]     | (5.1) [7.0; 10.6; 14.8]       |
| <b>Before first PD diagnosis</b>                                  | 2.5 (1.0) [1.6; 2.4; 3.2]     | (4.8) [3.3; 6.3; 10.6]        |
| <b>After first PD diagnosis</b>                                   | 1.6 (1.0) [0.8; 1.5; 2.4]     | 3.9 (2.5) [2.0; 3.5; 5.4]     |
| <b>No. of unique prescribed drugs</b>                             | 15.6 (9.3) [9.0; 14.0; 21.0]  | 20.7 (18.2) [7.0; 15.0; 29.0] |
| <b>Insurance</b>                                                  |                               |                               |
| <b>Medicare, Medicaid, other public</b>                           | 60%                           | 80%                           |
| <b>Commercial, private only</b>                                   | 40%                           | 18%                           |
| <b>Other or unknown</b>                                           | 0%                            | 2%                            |
| <b>Baseline characteristics (during ≤1 year before diagnosis)</b> |                               |                               |
| <b>Age at first diagnosis</b>                                     | 68.5 (8.5) [61.8; 66.2; 74.7] | 70.7 (7.7) [64.8; 70.4; 76.4] |
| <b>Women</b>                                                      | 38%                           | 37%                           |

|                                                                        |                           |                           |
|------------------------------------------------------------------------|---------------------------|---------------------------|
| <b>PD progression</b>                                                  |                           |                           |
| <b>Falls</b>                                                           | 3%                        | 4%                        |
| <b>Psychosis</b>                                                       | 1%                        | 1%                        |
| <b><u>Comorbidities (during ≤1 year before diagnosis)</u></b>          |                           |                           |
| <b>Charlson's Comorbidity Index</b>                                    | 1.1 (1.5) [0.0; 0.0; 2.0] | 0.6 (1.2) [0.0; 0.0; 1.0] |
| <b>Diabetes mellitus</b>                                               |                           |                           |
| <b>with no complications</b>                                           | 17.70%                    | 10.82%                    |
| <b>with chronic complications</b>                                      | 5.04%                     | 2.82%                     |
| <b>Cerebrovascular Disease</b>                                         | 15.30%                    | 6.39%                     |
| <b>COPD</b>                                                            | 10.50%                    | 4.83%                     |
| <b>Malignancy</b>                                                      | 10.00%                    | 7.09%                     |
| <b>Peripheral Vascular Disease</b>                                     | 8.21%                     | 4.28%                     |
| <b>Congestive Heart Failure</b>                                        | 4.88%                     | 3.22%                     |
| <b>Kidney Disease</b>                                                  | 4.36%                     | 3.87%                     |
| <b>Rheumatic Disease</b>                                               | 3.01%                     | 1.11%                     |
| <b>Myocardial Infarction</b>                                           | 2.07%                     | 1.66%                     |
| <b>Mild Liver Disease</b>                                              | 1.65%                     | 1.26%                     |
| <b>Hemiplegia Paraplegia</b>                                           | 1.42%                     | 0.50%                     |
| <b>Dementia</b>                                                        | 0.65%                     | 0.25%                     |
| <b>Peptic Ulcer Disease</b>                                            | 0.58%                     | 0.30%                     |
| <b>Severe Liver Disease</b>                                            | 0.10%                     | 0.10%                     |
| <b>Follow-up characteristics (during ≤2 years following diagnosis)</b> |                           |                           |
| <b>PD Progression</b>                                                  |                           |                           |
| <b>Dementia</b>                                                        | 15% <sup>†</sup> (11%)    | 12% <sup>†</sup> (11%)    |
| <b>Charlson's Comorbidity Index</b>                                    | 1.4 (1.9) [0.0; 1.0; 2.0] | 1.1 (1.8) [0.0; 0.0; 2.0] |

† 15% and 12% are Kaplan-Mayer estimators in MarketScan and Explorys resp., which adjust for censoring.

**Table S5. Zolpidem cohort characteristics.** Shown are the mean, standard deviation (in parentheses), and the first, second (median), and third quartile (in brackets).

|  | MarketScan | Explorys |
|--|------------|----------|
|--|------------|----------|

|                                                                   |                                |                                |
|-------------------------------------------------------------------|--------------------------------|--------------------------------|
| <b>Patient count</b>                                              | 847                            | 1,828                          |
| <b>Patient timeline [years]</b>                                   |                                |                                |
| <b>Total</b>                                                      | 4.0 (1.1) [3.0; 4.1; 5.0]      | 11.4 (5.1) [7.2; 11.1; 15.2]   |
| <b>Before first PD diagnosis</b>                                  | 2.2 (1.0) [1.4; 2.0; 2.8]      | 7.5 (4.7) [3.6; 6.7; 10.7]     |
| <b>After first PD diagnosis</b>                                   | 1.8 (1.1) [0.9; 1.6; 2.6]      | 3.9 (2.6) [1.8; 3.4; 5.4]      |
| <b>No. of unique prescribed drugs</b>                             | 25.1 (12.7) [16.0; 23.0; 32.0] | 40.3 (25.8) [20.0; 35.0; 55.0] |
| <b>Insurance</b>                                                  |                                |                                |
| <b>Medicare, Medicaid, other public</b>                           | 77%                            | 83%                            |
| <b>Commercial, private only</b>                                   | 23%                            | 9%                             |
| <b>Other or unknown</b>                                           | 0%                             | 8%                             |
| <b>Baseline characteristics (during ≤1 year before diagnosis)</b> |                                |                                |
| <b>Age at first diagnosis</b>                                     | 71.4 (10.1) [62.6; 70.0; 79.5] | 73.9 (7.8) [67.8; 74.8; 80.2]  |
| <b>Women</b>                                                      | 43%                            | 45%                            |
| <b>PD progression</b>                                             |                                |                                |
| <b>Falls</b>                                                      | 8%                             | 11%                            |
| <b>Psychosis</b>                                                  | 5%                             | 4%                             |
| <b>Comorbidities (during ≤1 year before diagnosis)</b>            |                                |                                |
| <b>Charlson's Comorbidity Index</b>                               | 2.1 (2.3) [0.0; 1.0; 3.0]      | 1.7 (2.1) [0.0; 1.0; 3.0]      |
| <b>Diabetes mellitus</b>                                          |                                |                                |
| <b>with no complications</b>                                      | 28.60%                         | 25.44%                         |
| <b>with chronic complications</b>                                 | 12.80%                         | 7.28%                          |
| <b>COPD</b>                                                       | 25.00%                         | 21.55%                         |
| <b>Cerebrovascular Disease</b>                                    | 21.50%                         | 13.07%                         |
| <b>Congestive Heart Failure</b>                                   | 17.70%                         | 14.39%                         |
| <b>Peripheral Vascular Disease</b>                                | 14.40%                         | 10.72%                         |
| <b>Kidney Disease</b>                                             | 14.00%                         | 14.00%                         |
| <b>Malignancy</b>                                                 | 12.50%                         | 9.85%                          |
| <b>Myocardial Infarction</b>                                      | 5.90%                          | 7.33%                          |
| <b>Mild Liver Disease</b>                                         | 4.13%                          | 2.30%                          |
| <b>Rheumatic Disease</b>                                          | 2.95%                          | 3.23%                          |
| <b>Dementia</b>                                                   | 2.48%                          | 0.60%                          |

|                                                                        |                           |                           |
|------------------------------------------------------------------------|---------------------------|---------------------------|
| <b>Hemiplegia Paraplegia</b>                                           | 1.77%                     | 1.09%                     |
| <b>Peptic Ulcer Disease</b>                                            | 1.77%                     | 2.08%                     |
| <b>Severe Liver Disease</b>                                            | 0.59%                     | 0.22%                     |
| <b>Follow-up characteristics (during ≤2 years following diagnosis)</b> |                           |                           |
| <b>PD Progression</b>                                                  |                           |                           |
| <b>Dementia</b>                                                        | 26% <sup>†</sup> (20%)    | 23% <sup>†</sup> (21%)    |
| <b>Charlson's Comorbidity Index</b>                                    | 2.8 (2.9) [0.0; 2.0; 4.0] | 3.0 (3.0) [1.0; 2.0; 5.0] |

† 26% and 23% are Kaplan-Mayer estimators in MarketScan and Explorys resp., which adjust for censoring.

**Table S6. N04 cohort characteristics.** Shown are the mean, standard deviation (in parentheses), and the first, second (median), and third quartile (in brackets).

|                                                                   | <b>MarketScan</b>              | <b>Explorys</b>               |
|-------------------------------------------------------------------|--------------------------------|-------------------------------|
| <b>Patient count</b>                                              | 10,289                         | 12,408                        |
| <b>Patient timeline [years]</b>                                   |                                |                               |
| <b>Total</b>                                                      | 4.1 (1.0) [3.1; 4.8; 5.0]      | 10.9 (5.1) [6.8; 10.5; 14.6]  |
| <b>Before first PD diagnosis</b>                                  | 2.5 (1.1) [1.6; 2.3; 3.3]      | (4.7) [3.6; 6.5; 10.6]        |
| <b>After first PD diagnosis</b>                                   | 1.6 (1.0) [0.8; 1.4; 2.4]      | 3.5 (2.6) [1.5; 2.8; 4.8]     |
| <b>No. of unique prescribed drugs</b>                             | 17.4 (10.4) [10.0; 16.0; 23.0] | 18.3 (17.8) [5.0; 13.0; 25.0] |
| <b>Insurance</b>                                                  |                                |                               |
| <b>Medicare, Medicaid, other public</b>                           | 79%                            | 82%                           |
| <b>Commercial, private only</b>                                   | 21%                            | 12%                           |
| <b>Other or unknown</b>                                           | 0%                             | 6%                            |
| <b>Baseline characteristics (during ≤1 year before diagnosis)</b> |                                |                               |
| <b>Age at first diagnosis</b>                                     | 73.3 (9.8) [64.6; 73.6; 81.1]  | 73.7 (7.9) [67.9; 74.5; 79.9] |
| <b>Women</b>                                                      | 42%                            | 44%                           |
| <b>PD progression</b>                                             |                                |                               |
| <b>Falls</b>                                                      | 5%                             | 4%                            |
| <b>Psychosis</b>                                                  | 3%                             | 1%                            |
| <b>Comorbidities (during ≤1 year before diagnosis)</b>            |                                |                               |

|                                                                        |                           |                           |
|------------------------------------------------------------------------|---------------------------|---------------------------|
| <b>Charlson's Comorbidity Index</b>                                    | 1.7 (2.0) [0.0; 1.0; 3.0] | 0.8 (1.3) [0.0; 0.0; 1.0] |
| <b>Diabetes mellitus</b>                                               |                           |                           |
| with no complications                                                  | 25.80%                    | 14.74%                    |
| with chronic complications                                             | 9.71%                     | 3.48%                     |
| <b>Cerebrovascular Disease</b>                                         | 22.10%                    | 8.13%                     |
| <b>COPD</b>                                                            | 17.50%                    | 7.87%                     |
| <b>Peripheral Vascular Disease</b>                                     | 14.20%                    | 4.80%                     |
| <b>Malignancy</b>                                                      | 11.60%                    | 6.58%                     |
| <b>Congestive Heart Failure</b>                                        | 10.90%                    | 4.69%                     |
| <b>Kidney Disease</b>                                                  | 9.56%                     | 4.89%                     |
| <b>Myocardial Infarction</b>                                           | 3.82%                     | 2.09%                     |
| <b>Rheumatic Disease</b>                                               | 3.43%                     | 1.91%                     |
| <b>Mild Liver Disease</b>                                              | 2.66%                     | 1.20%                     |
| <b>Dementia</b>                                                        | 2.35%                     | 0.30%                     |
| <b>Hemiplegia Paraplegia</b>                                           | 2.31%                     | 0.60%                     |
| <b>Peptic Ulcer Disease</b>                                            | 1.28%                     | 0.58%                     |
| <b>Severe Liver Disease</b>                                            | 0.34%                     | 0.13%                     |
| <b>Follow-up characteristics (during ≤2 years following diagnosis)</b> |                           |                           |
| <b>PD progression</b>                                                  |                           |                           |
| <b>Dementia</b>                                                        | 28% <sup>†</sup> (21%)    | 19% <sup>†</sup> (17%)    |
| <b>Charlson's Comorbidity Index</b>                                    | 2.2 (2.5) [0.0; 1.0; 3.0] | 1.6 (2.1) [0.0; 1.0; 2.0] |

† 28% and 19% are Kaplan-Mayer estimators in MarketScan and Explorys resp., which adjust for censoring.

**Table S7. N05 cohort characteristics.** Shown are the mean, standard deviation (in parentheses), and the first, second (median), and third quartile (in brackets).

|                                  | <b>MarketScan</b>         | <b>Explorys</b>        |
|----------------------------------|---------------------------|------------------------|
| <b>Patient count</b>             | 3,116                     | 9,067                  |
| <b>Patient timeline [years]</b>  |                           |                        |
| <b>Total</b>                     | 4.0 (1.1) [3.0; 4.2; 5.0] | (5.0) [6.5; 9.6; 14.1] |
| <b>Before first PD diagnosis</b> | 2.3 (1.0) [1.5; 2.1; 3.0] | (4.6) [3.4; 6.1; 10.1] |

|                                                                   |                                |                                |
|-------------------------------------------------------------------|--------------------------------|--------------------------------|
| <b>After first PD diagnosis</b>                                   | 1.7 (1.1) [0.8; 1.5; 2.6]      | 3.3 (2.4) [1.5; 2.8; 4.5]      |
| <b>No. of unique prescribed drugs</b>                             | 19.4 (10.0) [12.0; 18.0; 25.0] | 24.4 (17.8) [11.0; 20.0; 33.0] |
| <b>Insurance</b>                                                  |                                |                                |
| <b>Medicare, Medicaid, other public</b>                           | 83%                            | 84%                            |
| <b>Commercial, private only</b>                                   | 17%                            | 9%                             |
| <b>Other or unknown</b>                                           | 0%                             | 7%                             |
| <b>Baseline characteristics (during ≤1 year before diagnosis)</b> |                                |                                |
| <b>Age at first diagnosis</b>                                     | 74.0 (9.9) [65.1; 74.4; 82.1]  | (7.9) [68.9; 75.4; 80.8]       |
| <b>Women</b>                                                      | 48%                            | 45%                            |
| <b>PD progression</b>                                             |                                |                                |
| <b>Falls</b>                                                      | 6%                             | 10%                            |
| <b>Psychosis</b>                                                  | 7%                             | 4%                             |
| <b>Comorbidities (during ≤1 year before diagnosis)</b>            |                                |                                |
| <b>Charlson's Comorbidity Index</b>                               | 1.8 (2.1) [0.0; 1.0; 3.0]      | 1.1 (1.7) [0.0; 0.0; 2.0]      |
| <b>Diabetes mellitus</b>                                          |                                |                                |
| <b>with no complications</b>                                      | 24.80%                         | 19.44%                         |
| <b>with chronic complications</b>                                 | 9.11%                          | 4.88%                          |
| <b>Cerebrovascular Disease</b>                                    | 20.10%                         | 10.09%                         |
| <b>COPD</b>                                                       | 19.80%                         | 13.60%                         |
| <b>Peripheral Vascular Disease</b>                                | 15.60%                         | 7.28%                          |
| <b>Congestive Heart Failure</b>                                   | 14.20%                         | 10.18%                         |
| <b>Malignancy</b>                                                 | 10.30%                         | 7.59%                          |
| <b>Kidney Disease</b>                                             | 9.24%                          | 8.16%                          |
| <b>Myocardial Infarction</b>                                      | 5.33%                          | 4.58%                          |
| <b>Dementia</b>                                                   | 4.72%                          | 0.73%                          |
| <b>Rheumatic Disease</b>                                          | 3.53%                          | 2.44%                          |
| <b>Mild Liver Disease</b>                                         | 2.76%                          | 1.57%                          |
| <b>Hemiplegia Paraplegia</b>                                      | 2.18%                          | 1.07%                          |
| <b>Peptic Ulcer Disease</b>                                       | 1.38%                          | 0.83%                          |
| <b>Severe Liver Disease</b>                                       | 0.42%                          | 0.19%                          |



| Follow-up characteristics (during ≤2 years following diagnosis) |                           |                           |
|-----------------------------------------------------------------|---------------------------|---------------------------|
| <b>PD progression</b>                                           |                           |                           |
| <b>Dementia</b>                                                 | 38% <sup>†</sup> (30%)    | 29% <sup>†</sup> (27%)    |
| <b>Charlson's Comorbidity Index</b>                             | 2.4 (2.7) [0.0; 2.0; 4.0] | 2.3 (2.6) [0.0; 2.0; 4.0] |

† 38% and 29% are Kaplan-Mayer estimators in MarketScan and Explorys resp., which adjust for censoring.

**Table S8. Estimated effects on dementia onset for emulated RCTs involving rasagiline and its encompassing ATC classes.** For composition of treatment and control cohorts, Table S10. Beneficial effect is highlighted in green and non-beneficial effect is highlighted in Red.

|                  |            | Control cohort    |               |                  |               |                           |               |                           |               |
|------------------|------------|-------------------|---------------|------------------|---------------|---------------------------|---------------|---------------------------|---------------|
|                  |            | N04BD             |               | N04B             |               | N04                       |               | N                         |               |
|                  |            | Estimated effects |               |                  |               |                           |               |                           |               |
|                  |            | Weight balancing  | Outcome model | Weight balancing | Outcome model | Weight balancing          | Outcome model | Weight balancing          | Outcome model |
|                  |            | MarketScan        |               |                  |               |                           |               |                           |               |
| Treatment cohort | Rasagiline | -0.009            | -0.06         | -0.09            | -0.07         | -0.09                     | -0.07         | -0.09                     | -0.07         |
|                  | N04BD      |                   |               | -0.08            | -0.06         | -0.08                     | -0.06         | -0.08                     | -0.06         |
|                  | N04B       |                   |               |                  |               | 0.13                      | -0.08         | Failed to balance cohorts |               |
|                  | N04        |                   |               |                  |               |                           |               | Failed to balance cohorts |               |
|                  |            | Explorys          |               |                  |               |                           |               |                           |               |
| Treatment cohort | Rasagiline | -0.06             | -0.08         | -0.09            | -0.07         | -0.08                     | -0.07         | -0.09                     | -0.09         |
|                  | N04BD      |                   |               | -0.11            | -0.11         | -0.11                     | -0.1          | -0.08                     | -0.08         |
|                  | N04B       |                   |               |                  |               | Failed to balance cohorts |               | -0.00013                  | -0.11         |
|                  | N04        |                   |               |                  |               |                           |               | -0.01                     | -0.1          |

**Table S9. Estimated effects on dementia onset for emulated RCTs involving zolpidem and its encompassing ATC classes.** For composition of treatment and control cohorts, see Table S10. Beneficial effect is highlighted in green and non-beneficial effect is highlighted in Red.

|                  |          | Control cohort           |               |                  |               |                  |               |                  |               |
|------------------|----------|--------------------------|---------------|------------------|---------------|------------------|---------------|------------------|---------------|
|                  |          | N05CF                    |               | N05C             |               | N05              |               | N                |               |
|                  |          | Estimated effects        |               |                  |               |                  |               |                  |               |
|                  |          | Weight balancing         | Outcome model | Weight balancing | Outcome model | Weight balancing | Outcome model | Weight balancing | Outcome model |
|                  |          | MarketScan               |               |                  |               |                  |               |                  |               |
| Treatment cohort | Zolpidem | -0.03                    | -0.1          | -0.13            | -0.13         | -0.12            | -0.1          | -0.09            | -0.04         |
|                  | N05CF    |                          |               | -0.13            | -0.12         | -0.13            | -0.12         | -0.08            | -0.05         |
|                  | N05C     |                          |               |                  |               | -0.06            | -0.07         | -0.05            | -0.006        |
|                  | N05      |                          |               |                  |               |                  |               | 0.03             | 0.02          |
|                  |          | Explorys                 |               |                  |               |                  |               |                  |               |
| Treatment cohort | Zolpidem | Control cohort too small | 0.01          | 0.006            | -0.08         | -0.08            | -0.02         | -0.01            |               |
|                  | N05CF    |                          | 0.03          | 0.01             | -0.06         | -0.07            | -0.02         | -0.01            |               |
|                  | N05C     |                          |               |                  | -0.12         | -0.11            | -0.06         | -0.03            |               |
|                  | N05      |                          |               |                  |               |                  | 0.07          | 0.02             |               |
