# Supplementary material for: Emulated Clinical Trials from Longitudinal Real-World Data Efficiently Identify Candidates for Neurological Disease Modification: Examples from Parkinson’s Disease
Source: bioRxiv or medRxiv preprint supplement (doi:10.1101/2020.08.11.20171447), 2020-11-20
Supplement: Supplementary file [file media-1.pdf]

***Supplemental Material for “Emulated Clinical Trials from Longitudinal Real-World Data Efficiently Identify Candidates for Neurological Disease Modification: Examples from Parkinson's Disease”***

**Table S1. ICD codes for PD cohort definition**

| Type      | System | Code  | Name                                                                   |
|-----------|--------|-------|------------------------------------------------------------------------|
| Inclusion | icd9   | 3320  | Paralysis agitans                                                      |
|           | icd10  | G20   | Parkinson's disease                                                    |
| Exclusion | icd9   | 3316  | Corticobasal degeneration                                              |
|           | icd9   | 3321  | Secondary parkinsonism                                                 |
|           | icd9   | 3330  | Other degenerative diseases of the basal ganglia                       |
|           | icd10  | G21   | Secondary parkinsonism                                                 |
|           | icd10  | G231  | Progressive supranuclear ophthalmoplegia [Steele-Richardson-Olszewski] |
|           | icd10  | G3185 | Corticobasal degeneration                                              |

**Table S2. PD-indicated drugs and their corresponding ATC class names.** The list below has been compiled by a domain expert based on the following sources: National Drug File – Reference Terminology (NDF-RT), Anatomical Therapeutic Chemical Classification System (ATC), and DrugBank (45).

| Drug                | ATC class code(s) | ATC class name(s)                                                                     |
|---------------------|-------------------|---------------------------------------------------------------------------------------|
| Amantadine          | N04BB             | Adamantane derivatives                                                                |
| Apomorphine         | G04BE; N04BC      | Drugs used in erectile dysfunction; dopamine agonists                                 |
| Atropine            | A03BA; S01FA      | Belladonna alkaloids, tertiary amines; anticholinergics                               |
| Benztropine         | N04AC             | Ethers of tropine or tropine derivatives                                              |
| Biperiden           | N04AA             | Tertiary amines                                                                       |
| Bornaprine          | N04AA             | Tertiary amines                                                                       |
| Bromocriptine       | G02CB; N04BC      | Prolactine inhibitors; dopamine agonists                                              |
| Budipine            | N04BX             | Other dopaminergic agents                                                             |
| Cabergoline         | G02CB; N04BC      | Prolactine inhibitors; dopamine agonists                                              |
| Carbidopa           | N/A               | N/A                                                                                   |
| Dexetimide          | N04AA             | Tertiary amines                                                                       |
| Dihydroergocryptine | N04BC             | Dopamine agonists                                                                     |
| Entacapone          | N04BX             | Other dopaminergic agents                                                             |
| Hyoscyamine         | A03BA             | Belladonna alkaloids, tertiary amines                                                 |
| Levodopa            | N04BA             | Dopa and dopa derivatives                                                             |
| Methixene           | N04AA             | Tertiary amines                                                                       |
| Orphenadrine        | N04AB; M03BC      | Ethers chemically close to antihistamines; ethers, chemically close to antihistamines |
| Pergolide           | N04BC             | Dopamine agonists                                                                     |
| Piribedil           | N04BC             | Dopamine agonists                                                                     |
| Pramipexole         | N04BC             | Dopamine agonists                                                                     |
| Procyclidine        | N04AA             | Tertiary amines                                                                       |
| Profenamine         | N04AA             | Tertiary amines                                                                       |
| Rasagiline          | N04BD             | Monoamine oxidase B inhibitors                                                        |
| Ropinirole          | N04BC             | Dopamine agonists                                                                     |
| Rotigotine          | N04BC             | Dopamine agonists                                                                     |
| Selegiline          | N04BD             | Monoamine oxidase B inhibitors                                                        |
| Tolcapone           | N04BX             | Other dopaminergic agents                                                             |
| Trihexyphenidyl     | N04AA             | Tertiary amines                                                                       |
| Tropatepine         | N04AA             | Tertiary amines                                                                       |

**Table S3. PD outcome definitions.**

| Outcome   | System | Code   | Name                                                               |
|-----------|--------|--------|--------------------------------------------------------------------|
| Fall      | ICD9   | E88    | Accidental falls                                                   |
|           | ICD10  | W0, W1 | Falls                                                              |
| Psychosis | ICD9   | 292    | Drug-induced mental disorders                                      |
|           |        | 297    | Delusional disorders                                               |
|           |        | 298    | Other nonorganic psychoses                                         |
|           | ICD10  | F2     | Schizophrenia, schizotypal and delusional disorders                |
| Dementia  | ICD9   | 294    | Persistent mental disorders due to conditions classified elsewhere |
|           |        | 331    | Other cerebral degenerations                                       |
|           | ICD10  | F01    | Vascular dementia                                                  |
|           |        | F02    | Dementia in other diseases classified elsewhere                    |
|           |        | F03    | Unspecified dementia                                               |
|           |        | G30    | Alzheimer disease                                                  |

**Table S4. Rasagiline cohort characteristics.** Shown are the mean, standard deviation (in parentheses), and the first, second (median), and third quartile (in brackets).

|                                                                                          | <b>MarketScan</b>             | <b>Explorys</b>               |
|------------------------------------------------------------------------------------------|-------------------------------|-------------------------------|
| <b>Patient count</b>                                                                     | 3,094                         | 1,988                         |
| <b>Patient timeline [years]</b>                                                          |                               |                               |
| <b>Total</b>                                                                             | 4.1 (1.0) [3.0; 4.6; 5.0]     | 11.2 (5.1) [7.0; 10.6; 14.8]  |
| <b>Before index date</b>                                                                 | 2.5 (1.0) [1.6; 2.4; 3.2]     | 7.3 (4.8) [3.3; 6.3; 10.6]    |
| <b>After index date</b>                                                                  | 1.6 (1.0) [0.8; 1.5; 2.4]     | 3.9 (2.5) [2.0; 3.5; 5.4]     |
| <b>No. of unique prescribed drugs</b>                                                    | 15.6 (9.3) [9.0; 14.0; 21.0]  | 20.7 (18.2) [7.0; 15.0; 29.0] |
| <b>Insurance</b>                                                                         |                               |                               |
| <b>Medicare, Medicaid, other public</b>                                                  | 60%                           | 80%                           |
| <b>Commercial, private only</b>                                                          | 40%                           | 18%                           |
| <b>Other or unknown</b>                                                                  | 0%                            | 2%                            |
| <b>Baseline characteristics (during <math>\leq 1</math> year index date)</b>             |                               |                               |
| <b>Age at index date</b>                                                                 | 68.5 (8.5) [61.8; 66.2; 74.7] | 70.7 (7.7) [64.8; 70.4; 76.4] |
| <b>Women</b>                                                                             | 38%                           | 37%                           |
| <b>Charlson's Comorbidity Index</b>                                                      | 1.1 (1.5) [0.0; 0.0; 2.0]     | 0.6 (1.2) [0.0; 0.0; 1.0]     |
| <b>PD related diagnoses</b>                                                              |                               |                               |
| <b>Falls</b>                                                                             | 3%                            | 4%                            |
| <b>Psychosis</b>                                                                         | 1%                            | 1%                            |
| <b>Follow-up characteristics (during <math>\leq 2</math> years following index date)</b> |                               |                               |
| <b>PD Progression</b>                                                                    |                               |                               |
| <b>Dementia</b>                                                                          | 15% <sup>†</sup> (11%)        | 12% <sup>†</sup> (11%)        |
| <b>Charlson's Comorbidity Index</b>                                                      | 1.4 (1.9) [0.0; 1.0; 2.0]     | 1.1 (1.8) [0.0; 0.0; 2.0]     |

<sup>†</sup> 15% and 12% are Kaplan-Mayer estimators in MarketScan and Explorys resp., which adjust for censoring.

**Table S5. Zolpidem cohort characteristics.** Shown are the mean, standard deviation (in parentheses), and the first, second (median), and third quartile (in brackets).

|                                                                         | <b>MarketScan</b>              | <b>Explorys</b>                |
|-------------------------------------------------------------------------|--------------------------------|--------------------------------|
| <b>Patient count</b>                                                    | 847                            | 1,828                          |
| <b>Patient timeline [years]</b>                                         |                                |                                |
| <b>Total</b>                                                            | 4.0 (1.1) [3.0; 4.1; 5.0]      | 11.4 (5.1) [7.2; 11.1; 15.2]   |
| <b>Before index date</b>                                                | 2.2 (1.0) [1.4; 2.0; 2.8]      | 7.5 (4.7) [3.6; 6.7; 10.7]     |
| <b>After index date</b>                                                 | 1.8 (1.1) [0.9; 1.6; 2.6]      | 3.9 (2.6) [1.8; 3.4; 5.4]      |
| <b>No. of unique prescribed drugs</b>                                   | 25.1 (12.7) [16.0; 23.0; 32.0] | 40.3 (25.8) [20.0; 35.0; 55.0] |
| <b>Insurance</b>                                                        |                                |                                |
| <b>Medicare, Medicaid, other public</b>                                 | 77%                            | 83%                            |
| <b>Commercial, private only</b>                                         | 23%                            | 9%                             |
| <b>Other or unknown</b>                                                 | 0%                             | 8%                             |
| <b>Baseline characteristics (during ≤1 year before index date)</b>      |                                |                                |
| <b>Age at index date</b>                                                | 71.4 (10.1) [62.6; 70.0; 79.5] | 73.9 (7.8) [67.8; 74.8; 80.2]  |
| <b>Women</b>                                                            | 43%                            | 45%                            |
| <b>Charlson's Comorbidity Index</b>                                     | 2.1 (2.3) [0.0; 1.0; 3.0]      | 1.7 (2.1) [0.0; 1.0; 3.0]      |
| <b>PD related diagnoses</b>                                             |                                |                                |
| <b>Falls</b>                                                            | 8%                             | 11%                            |
| <b>Psychosis</b>                                                        | 5%                             | 4%                             |
| <b>Follow-up characteristics (during ≤2 years following index date)</b> |                                |                                |
| <b>PD Progression</b>                                                   |                                |                                |
| <b>Dementia</b>                                                         | 26% <sup>†</sup> (20%)         | 23% <sup>†</sup> (21%)         |
| <b>Charlson's Comorbidity Index</b>                                     | 2.8 (2.9) [0.0; 2.0; 4.0]      | 3.0 (3.0) [1.0; 2.0; 5.0]      |

<sup>†</sup> 26% and 23% are Kaplan-Mayer estimators in MarketScan and Explorys resp., which adjust for censoring.

**Table S6. N04 cohort characteristics.** Shown are the mean, standard deviation (in parentheses), and the first, second (median), and third quartile (in brackets).

|                                                                         | <b>MarketScan</b>              | <b>Explorys</b>               |
|-------------------------------------------------------------------------|--------------------------------|-------------------------------|
| <b>Patient count</b>                                                    | 10,289                         | 12,408                        |
| <b>Patient timeline [years]</b>                                         |                                |                               |
| <b>Total</b>                                                            | 4.1 (1.0) [3.1; 4.8; 5.0]      | 10.9 (5.1) [6.8; 10.5; 14.6]  |
| <b>Before index date</b>                                                | 2.5 (1.1) [1.6; 2.3; 3.3]      | 7.5 (4.7) [3.6; 6.5; 10.6]    |
| <b>After index date</b>                                                 | 1.6 (1.0) [0.8; 1.4; 2.4]      | 3.5 (2.6) [1.5; 2.8; 4.8]     |
| <b>No. of unique prescribed drugs</b>                                   | 17.4 (10.4) [10.0; 16.0; 23.0] | 18.3 (17.8) [5.0; 13.0; 25.0] |
| <b>Insurance</b>                                                        |                                |                               |
| <b>Medicare, Medicaid, other public</b>                                 | 79%                            | 82%                           |
| <b>Commercial, private only</b>                                         | 21%                            | 12%                           |
| <b>Other or unknown</b>                                                 | 0%                             | 6%                            |
| <b>Baseline characteristics (during ≤1 year before index date)</b>      |                                |                               |
| <b>Age at first diagnosis</b>                                           | 73.3 (9.8) [64.6; 73.6; 81.1]  | 73.7 (7.9) [67.9; 74.5; 79.9] |
| <b>Women</b>                                                            | 42%                            | 44%                           |
| <b>Charlson's Comorbidity Index</b>                                     | 1.7 (2.0) [0.0; 1.0; 3.0]      | 0.8 (1.3) [0.0; 0.0; 1.0]     |
| <b>PD related diagnoses</b>                                             |                                |                               |
| <b>Falls</b>                                                            | 5%                             | 4%                            |
| <b>Psychosis</b>                                                        | 3%                             | 1%                            |
| <b>Follow-up characteristics (during ≤2 years following index date)</b> |                                |                               |
| <b>PD progression</b>                                                   |                                |                               |
| <b>Dementia</b>                                                         | 28% <sup>†</sup> (21%)         | 19% <sup>†</sup> (17%)        |
| <b>Charlson's Comorbidity Index</b>                                     | 2.2 (2.5) [0.0; 1.0; 3.0]      | 1.6 (2.1) [0.0; 1.0; 2.0]     |

<sup>†</sup> 28% and 19% are Kaplan-Mayer estimators in MarketScan and Explorys resp., which adjust for censoring.

**Table S7. N05 cohort characteristics.** Shown are the mean, standard deviation (in parentheses), and the first, second (median), and third quartile (in brackets).

|                                                                         | <b>MarketScan</b>              | <b>Explorys</b>                |
|-------------------------------------------------------------------------|--------------------------------|--------------------------------|
| <b>Patient count</b>                                                    | 3,116                          | 9,067                          |
| <b>Patient timeline [years]</b>                                         |                                |                                |
| <b>Total</b>                                                            | 4.0 (1.1) [3.0; 4.2; 5.0]      | 10.4 (5.0) [6.5; 9.6; 14.1]    |
| <b>Before index date</b>                                                | 2.3 (1.0) [1.5; 2.1; 3.0]      | 7.1 (4.6) [3.4; 6.1; 10.1]     |
| <b>After index date</b>                                                 | 1.7 (1.1) [0.8; 1.5; 2.6]      | 3.3 (2.4) [1.5; 2.8; 4.5]      |
| <b>No. of unique prescribed drugs</b>                                   | 19.4 (10.0) [12.0; 18.0; 25.0] | 24.4 (17.8) [11.0; 20.0; 33.0] |
| <b>Insurance</b>                                                        |                                |                                |
| <b>Medicare, Medicaid, other public</b>                                 | 83%                            | 84%                            |
| <b>Commercial, private only</b>                                         | 17%                            | 9%                             |
| <b>Other or unknown</b>                                                 | 0%                             | 7%                             |
| <b>Baseline characteristics (during ≤1 year before index date)</b>      |                                |                                |
| <b>Age at first diagnosis</b>                                           | 74.0 (9.9) [65.1; 74.4; 82.1]  | (7.9) [68.9; 75.4; 80.8]       |
| <b>Women</b>                                                            | 48%                            | 45%                            |
| <b>Charlson's Comorbidity Index</b>                                     | 1.8 (2.1) [0.0; 1.0; 3.0]      | 1.1 (1.7) [0.0; 0.0; 2.0]      |
| <b>PD related diagnoses</b>                                             |                                |                                |
| <b>Falls</b>                                                            | 6%                             | 10%                            |
| <b>Psychosis</b>                                                        | 7%                             | 4%                             |
| <b>Follow-up characteristics (during ≤2 years following index date)</b> |                                |                                |
| <b>PD progression</b>                                                   |                                |                                |
| <b>Dementia</b>                                                         | 38% <sup>†</sup> (30%)         | 29% <sup>†</sup> (27%)         |
| <b>Charlson's Comorbidity Index</b>                                     | 2.4 (2.7) [0.0; 2.0; 4.0]      | 2.3 (2.6) [0.0; 2.0; 4.0]      |

<sup>†</sup> 38% and 29% are Kaplan-Mayer estimators in MarketScan and Explorys resp., which adjust for censoring.

**Table S8. Estimated effects on dementia onset for emulated RCTs involving rasagiline and its encompassing ATC classes.** For composition of treatment and control cohorts, see Table S10. Beneficial effect is highlighted in green and non-beneficial effect is highlighted in red.

|                  |            | <b>Control cohort</b>    |               |                  |               |                           |               |                           |               |
|------------------|------------|--------------------------|---------------|------------------|---------------|---------------------------|---------------|---------------------------|---------------|
|                  |            | N04BD                    |               | N04B             |               | N04                       |               | N                         |               |
|                  |            | <b>Estimated effects</b> |               |                  |               |                           |               |                           |               |
|                  |            | Weight balancing         | Outcome model | Weight balancing | Outcome model | Weight balancing          | Outcome model | Weight balancing          | Outcome model |
|                  |            | <b>MarketScan</b>        |               |                  |               |                           |               |                           |               |
| Treatment cohort | Rasagiline | -0.009                   | -0.06         | -0.09            | -0.07         | -0.09                     | -0.07         | -0.09                     | -0.07         |
|                  | N04BD      |                          |               | -0.08            | -0.06         | -0.08                     | -0.06         | -0.08                     | -0.06         |
|                  | N04B       |                          |               |                  |               | 0.13                      | -0.08         | Failed to balance cohorts |               |
|                  | N04        |                          |               |                  |               |                           |               | Failed to balance cohorts |               |
|                  |            | <b>Explorys</b>          |               |                  |               |                           |               |                           |               |
| Treatment cohort | Rasagiline | -0.06                    | -0.08         | -0.09            | -0.07         | -0.08                     | -0.07         | -0.09                     | -0.09         |
|                  | N04BD      |                          |               | -0.11            | -0.11         | -0.11                     | -0.1          | -0.08                     | -0.08         |
|                  | N04B       |                          |               |                  |               | Failed to balance cohorts |               | -0.00013                  | -0.11         |
|                  | N04        |                          |               |                  |               |                           |               | -0.01                     | -0.1          |



**Table S9. Estimated effects on dementia onset for emulated RCTs involving zolpidem and its encompassing ATC classes.** For composition of treatment and control cohorts, see Table S10. Beneficial effect is highlighted in green and non-beneficial effect is highlighted in red.

|                  |          | Control cohort           |               |                  |               |                  |               |                  |               |
|------------------|----------|--------------------------|---------------|------------------|---------------|------------------|---------------|------------------|---------------|
|                  |          | N05CF                    |               | N05C             |               | N05              |               | N                |               |
|                  |          | Estimated effects        |               |                  |               |                  |               |                  |               |
|                  |          | Weight balancing         | Outcome model | Weight balancing | Outcome model | Weight balancing | Outcome model | Weight balancing | Outcome model |
|                  |          | MarketScan               |               |                  |               |                  |               |                  |               |
| Treatment cohort | Zolpidem | -0.03                    | -0.1          | -0.13            | -0.13         | -0.12            | -0.1          | -0.09            | -0.04         |
|                  | N05CF    |                          |               | -0.13            | -0.12         | -0.13            | -0.12         | -0.08            | -0.05         |
|                  | N05C     |                          |               |                  |               | -0.06            | -0.07         | -0.05            | -0.006        |
|                  | N05      |                          |               |                  |               |                  |               | 0.03             | 0.02          |
|                  |          | Explorys                 |               |                  |               |                  |               |                  |               |
| Treatment cohort | Zolpidem | Control cohort too small |               | 0.01             | 0.006         | -0.08            | -0.08         | -0.02            | -0.01         |
|                  | N05CF    |                          |               | 0.03             | 0.01          | -0.06            | -0.07         | -0.02            | -0.01         |
|                  | N05C     |                          |               |                  |               | -0.12            | -0.11         | -0.06            | -0.03         |
|                  | N05      |                          |               |                  |               |                  |               | 0.07             | 0.02          |
